# Supplementary material for: The role of energy storage in deep decarbonization of electricity production
Source: PubMed Central journal article supplement (PMC6667472; doi:10.1038/s41467-019-11161-5), 2019-07-30
Supplement: 41467_2019_11161_MOESM1_ESM.pdf [file 41467_2019_11161_MOESM1_ESM.pdf]

## Supplementary Information

The role of energy storage in deep decarbonization of electricity production

Arbabzadeh *et al.*

Supplementary Table 1: Energy storage capacity (GWh) installed in the CAISO system in 2012 with different wind- and solar-penetration levels and CO<sub>2</sub>-emissions taxes in the base case with a 7.0-GW minimum-dispatchability requirement.

| Technology | Solar<br>(GW) | \$0 per ton Tax |       |       | \$50 per ton Tax |       |       | \$100 per ton Tax |       |       | \$200 per ton Tax |       |       |
|------------|---------------|-----------------|-------|-------|------------------|-------|-------|-------------------|-------|-------|-------------------|-------|-------|
|            |               | 0 GW            | 10 GW | 20 GW | 0 GW             | 10 GW | 20 GW | 0 GW              | 10 GW | 20 GW | 0 GW              | 10 GW | 20 GW |
|            |               | Wind            | Wind  | Wind  | Wind             | Wind  | Wind  | Wind              | Wind  | Wind  | Wind              | Wind  | Wind  |
| PHS        | 0             | 0.0             | 0.0   | 0.0   | 0.0              | 0.0   | 0.0   | 0.0               | 0.0   | 0.0   | 0.0               | 0.0   | 7.5   |
|            | 20            | 0.0             | 0.0   | 0.0   | 0.0              | 0.0   | 15.7  | 0.1               | 7.8   | 50.0  | 7.2               | 16.3  | 120.3 |
|            | 40            | 27.7            | 33.0  | 37.2  | 60.9             | 67.4  | 97.4  | 72.8              | 84.7  | 155.9 | 85.1              | 172.2 | 190.1 |
| ACAES      | 0             | 0.0             | 0.0   | 0.0   | 0.0              | 0.0   | 0.0   | 0.0               | 0.0   | 0.0   | 0.0               | 0.0   | 0.0   |
|            | 20            | 0.0             | 0.0   | 0.0   | 0.0              | 0.0   | 0.0   | 0.0               | 0.0   | 1.3   | 2.4               | 7.3   | 13.8  |
|            | 40            | 0.0             | 0.0   | 0.0   | 30.1             | 33.2  | 25.4  | 52.5              | 57.1  | 47.1  | 70.6              | 76.1  | 69.9  |
| DCAES      | 0             | 0.0             | 0.0   | 0.0   | 0.0              | 0.0   | 0.0   | 0.0               | 0.0   | 0.0   | 0.0               | 0.0   | 12.0  |
|            | 20            | 0.0             | 0.0   | 0.0   | 0.0              | 0.0   | 17.6  | 0.0               | 8.6   | 71.4  | 10.9              | 31.3  | 207.7 |
|            | 40            | 36.3            | 34.8  | 24.9  | 91.2             | 100.9 | 109.6 | 116.6             | 137.7 | 143.9 | 167.1             | 217.8 | 236.1 |
| PbA        | 0             | 0.0             | 0.0   | 0.0   | 0.0              | 0.0   | 0.0   | 0.0               | 0.0   | 0.0   | 0.0               | 0.0   | 0.0   |
|            | 20            | 0.0             | 0.0   | 0.0   | 0.0              | 0.0   | 0.0   | 0.0               | 0.0   | 0.0   | 0.0               | 0.0   | 0.0   |
|            | 40            | 0.0             | 0.0   | 0.0   | 0.0              | 0.0   | 0.0   | 0.0               | 0.0   | 0.0   | 33.9              | 36.5  | 28.6  |
| VFB        | 0             | 0.0             | 0.0   | 0.0   | 0.0              | 0.0   | 0.0   | 0.0               | 0.0   | 0.0   | 0.0               | 0.0   | 0.0   |
|            | 20            | 0.0             | 0.0   | 0.0   | 0.0              | 0.0   | 0.0   | 0.0               | 0.0   | 0.0   | 0.0               | 0.0   | 0.0   |
|            | 40            | 0.0             | 0.0   | 0.0   | 0.0              | 0.0   | 0.0   | 6.1               | 2.0   | 0.0   | 42.8              | 45.7  | 36.2  |
| NaS        | 0             | 0.0             | 0.0   | 0.0   | 0.0              | 0.0   | 0.0   | 0.0               | 0.0   | 0.0   | 0.0               | 0.0   | 0.0   |
|            | 20            | 0.0             | 0.0   | 0.0   | 0.0              | 0.0   | 0.0   | 0.0               | 0.0   | 0.0   | 0.0               | 0.0   | 0.0   |
|            | 40            | 0.0             | 0.0   | 0.0   | 0.0              | 0.0   | 0.0   | 2.8               | 0.0   | 0.0   | 37.3              | 39.9  | 32.5  |
| PSB        | 0             | 0.0             | 0.0   | 0.0   | 0.0              | 0.0   | 0.0   | 0.0               | 0.0   | 0.0   | 0.0               | 0.0   | 0.0   |
|            | 20            | 0.0             | 0.0   | 0.0   | 0.0              | 0.0   | 0.0   | 0.0               | 0.0   | 0.0   | 0.0               | 0.0   | 0.9   |
|            | 40            | 0.0             | 0.0   | 0.0   | 0.0              | 0.0   | 0.0   | 18.3              | 19.0  | 12.7  | 43.5              | 48.6  | 41.2  |
| ZNBR       | 0             | 0.0             | 0.0   | 0.0   | 0.0              | 0.0   | 0.0   | 0.0               | 0.0   | 0.0   | 0.0               | 0.0   | 0.0   |
|            | 20            | 0.0             | 0.0   | 0.0   | 0.0              | 0.0   | 0.0   | 0.0               | 0.0   | 0.0   | 0.0               | 0.0   | 0.0   |
|            | 40            | 0.0             | 0.0   | 0.0   | 0.0              | 0.0   | 0.0   | 0.0               | 0.0   | 0.0   | 28.4              | 31.8  | 26.9  |

Supplementary Table 2: Energy storage capacity (GWh) installed in the ERCOT system in 2012 with different wind- and solar-penetration levels and CO<sub>2</sub>-emissions taxes in the base case with an 8.2-GW minimum-dispatchability requirement.

| Technology | Solar<br>(GW) | \$0 per ton Tax |       |       | \$50 per ton Tax |       |       | \$100 per ton Tax |       |       | \$200 per ton Tax |       |       |
|------------|---------------|-----------------|-------|-------|------------------|-------|-------|-------------------|-------|-------|-------------------|-------|-------|
|            |               | 0 GW            | 10 GW | 20 GW | 0 GW             | 10 GW | 20 GW | 0 GW              | 10 GW | 20 GW | 0 GW              | 10 GW | 20 GW |
|            |               | Wind            | Wind  | Wind  | Wind             | Wind  | Wind  | Wind              | Wind  | Wind  | Wind              | Wind  | Wind  |
| PHS        | 0             | 0.0             | 0.0   | 0.0   | 0.0              | 0.0   | 0.0   | 0.0               | 0.0   | 11.0  | 1.9               | 19.8  | 79.7  |
|            | 20            | 0.0             | 0.0   | 0.0   | 0.0              | 0.0   | 0.0   | 0.0               | 0.0   | 1.4   | 0.0               | 8.3   | 46.0  |
|            | 40            | 0.0             | 0.0   | 0.0   | 0.0              | 4.8   | 18.8  | 10.6              | 22.0  | 45.0  | 37.5              | 56.7  | 83.7  |
| ACAES      | 0             | 0.0             | 0.0   | 0.0   | 0.0              | 0.0   | 0.0   | 0.0               | 0.0   | 0.0   | 1.2               | 10.0  | 24.8  |
|            | 20            | 0.0             | 0.0   | 0.0   | 0.0              | 0.0   | 0.0   | 0.0               | 0.0   | 0.0   | 0.0               | 1.6   | 8.4   |
|            | 40            | 0.0             | 0.0   | 0.0   | 0.0              | 0.0   | 1.3   | 1.9               | 7.3   | 12.6  | 23.2              | 21.9  | 25.0  |
| DCAES      | 0             | 0.0             | 0.0   | 0.0   | 0.0              | 0.0   | 0.0   | 9.1               | 28.3  | 86.2  | 103.1             | 122.7 | 249.3 |
|            | 20            | 0.0             | 0.0   | 0.0   | 0.0              | 0.0   | 0.0   | 0.0               | 0.0   | 33.5  | 75.1              | 97.8  | 149.7 |
|            | 40            | 0.0             | 0.0   | 0.0   | 4.1              | 15.6  | 42.8  | 51.6              | 59.8  | 89.0  | 159.1             | 151.4 | 155.5 |
| PbA        | 0             | 0.0             | 0.0   | 0.0   | 0.0              | 0.0   | 0.0   | 0.0               | 0.0   | 0.0   | 0.0               | 0.0   | 0.0   |
|            | 20            | 0.0             | 0.0   | 0.0   | 0.0              | 0.0   | 0.0   | 0.0               | 0.0   | 0.0   | 0.0               | 0.0   | 0.0   |
|            | 40            | 0.0             | 0.0   | 0.0   | 0.0              | 0.0   | 0.0   | 0.0               | 0.0   | 0.8   | 0.6               | 3.5   | 5.3   |
| VFB        | 0             | 0.0             | 0.0   | 0.0   | 0.0              | 0.0   | 0.0   | 0.0               | 0.0   | 0.0   | 0.0               | 0.0   | 0.0   |
|            | 20            | 0.0             | 0.0   | 0.0   | 0.0              | 0.0   | 0.0   | 0.0               | 0.0   | 0.0   | 0.0               | 0.0   | 0.0   |
|            | 40            | 0.0             | 0.0   | 0.0   | 0.0              | 0.0   | 0.0   | 0.0               | 0.0   | 0.5   | 3.4               | 6.1   | 9.7   |
| NaS        | 0             | 0.0             | 0.0   | 0.0   | 0.0              | 0.0   | 0.0   | 0.0               | 0.0   | 0.0   | 0.0               | 0.0   | 0.0   |
|            | 20            | 0.0             | 0.0   | 0.0   | 0.0              | 0.0   | 0.0   | 0.0               | 0.0   | 0.0   | 0.0               | 0.0   | 0.0   |
|            | 40            | 0.0             | 0.0   | 0.0   | 0.0              | 0.0   | 0.0   | 0.0               | 0.0   | 0.7   | 1.3               | 4.3   | 7.0   |
| PSB        | 0             | 0.0             | 0.0   | 0.0   | 0.0              | 0.0   | 0.0   | 0.0               | 0.0   | 0.0   | 0.0               | 0.0   | 0.0   |
|            | 20            | 0.0             | 0.0   | 0.0   | 0.0              | 0.0   | 0.0   | 0.0               | 0.0   | 0.0   | 0.0               | 0.0   | 0.0   |
|            | 40            | 0.0             | 0.0   | 0.0   | 0.0              | 0.0   | 0.0   | 0.0               | 0.0   | 1.5   | 2.1               | 5.1   | 9.4   |
| ZNBR       | 0             | 0.0             | 0.0   | 0.0   | 0.0              | 0.0   | 0.0   | 0.0               | 0.0   | 0.0   | 0.0               | 0.0   | 0.0   |
|            | 20            | 0.0             | 0.0   | 0.0   | 0.0              | 0.0   | 0.0   | 0.0               | 0.0   | 0.0   | 0.0               | 0.0   | 0.0   |
|            | 40            | 0.0             | 0.0   | 0.0   | 0.0              | 0.0   | 0.0   | 0.0               | 0.0   | 0.5   | 0.0               | 0.9   | 2.9   |
