# Supplementary material for: The role of energy storage in deep decarbonization of electricity production
Source: PubMed Central journal article supplement (PMC6667472; doi:10.1038/s41467-019-11161-5), 2019-07-30
Supplement: 41467_2019_11161_MOESM3_ESM.pdf [file 41467_2019_11161_MOESM3_ESM.pdf]

### **Description of Additional Supplementary Files**

File Name: Supplementary Data 1

Description: Supplementary Data 1 summarizes the amounts of installed energy storage, renewable curtailment, and CO2 emissions in the other years and with the other minimum-dispatchability requirements that we analyze.
